# Supplementary material for: Nanoparticles traversing the extracellular matrix induce biophysical perturbation of fibronectin depicted by surface chemistry
Source: Royal Society of Chemistry journal article supplement (doi:10.1039/d3nr06305d), 2024-01-01
Supplement: d3nr06305d1.pdf [file d3nr06305d1.pdf]

## Supplementary Information

### **Nanoparticles traversing extracellular matrix induce biophysical perturbation of fibronectin depicted by surface chemistry**

Xing Guo,<sup>a,b</sup> Lin Yang,<sup>a</sup> Chaofan Deng,<sup>a</sup> Luyao Ren,<sup>a</sup> Shixin Li,<sup>c</sup> Xianren Zhang,<sup>d</sup> Jian Zhao<sup>a</sup> and Tongtao Yue<sup>\*a</sup>

*<sup>a</sup>Institute of Coastal Environmental Pollution Control, Key Laboratory of Marine Environment and Ecology, Ministry of Education, Ocean University of China, Qingdao, Shandong Province, 266100, China. E-mail: yuetongtao@ouc.edu.cn*

*<sup>b</sup>Guangdong Provincial Key Laboratory of Environmental Pollution and Health, School of Environment, Jinan University, Guangzhou, 511443, China*

*<sup>c</sup>Joint International Research Laboratory of Agriculture and Agri-product Safety of the Ministry of Education, Yangzhou University, Yangzhou 225009, China*

*<sup>d</sup>State Key Laboratory of Organic-Inorganic Composites, Beijing University of Chemical Technology, Beijing 100029, China*

**Table S1. List of MD simulations conducted in this work.**

| Simulation systems                                                            | Components                                               | Simulation box size (nm <sup>3</sup> ) | Simulation time (ns) |
|-------------------------------------------------------------------------------|----------------------------------------------------------|----------------------------------------|----------------------|
| <b>Unbiased MD simulations<br/>(Protein monomer)</b>                          | Fn-III <sub>7-10</sub>                                   | 20 × 20 × 20                           | 200                  |
|                                                                               | Fn-III <sub>7B89</sub>                                   |                                        |                      |
|                                                                               | NP-CH <sub>3</sub> & Fn-III <sub>7-10</sub>              |                                        |                      |
|                                                                               | NP-OH & Fn-III <sub>7-10</sub>                           |                                        |                      |
|                                                                               | NP-COO <sup>-</sup> & Fn-III <sub>7-10</sub>             |                                        |                      |
|                                                                               | NP-NH <sub>3</sub> <sup>+</sup> & Fn-III <sub>7-10</sub> |                                        | 300                  |
|                                                                               | NP-CH <sub>3</sub> & Fn-III <sub>7B89</sub>              |                                        | 200                  |
|                                                                               | NP-OH & Fn-III <sub>7B89</sub>                           |                                        |                      |
|                                                                               | NP-COO <sup>-</sup> & Fn-III <sub>7B89</sub>             |                                        |                      |
|                                                                               | NP-NH <sub>3</sub> <sup>+</sup> & Fn-III <sub>7B89</sub> |                                        |                      |
|                                                                               |                                                          |                                        |                      |
| <b>Unbiased MD simulations<br/>(Fn-III<sub>7B89</sub> head-to-tail dimer)</b> | Dimer                                                    | 20 × 9 × 7                             | 100                  |
|                                                                               | NP-CH <sub>3</sub> & Dimer                               | 20 × 20 × 20                           | 200                  |
|                                                                               | NP-OH & Dimer                                            |                                        |                      |
|                                                                               | NP-COO <sup>-</sup> & Dimer                              |                                        |                      |
|                                                                               | NP-NH <sub>3</sub> <sup>+</sup> & Dimer                  |                                        |                      |
| <b>Steered MD simulations</b>                                                 | Fn-III <sub>7-10</sub>                                   | 9.414 × 6.701 × 40                     | 100                  |
|                                                                               | Fn-III <sub>7B89</sub>                                   | 40 × 8.874 × 11.466                    |                      |
|                                                                               | NP-CH <sub>3</sub> & Fn-III <sub>7-10</sub>              | 40 × 11 × 15                           |                      |
|                                                                               | NP-OH & Fn-III <sub>7-10</sub>                           | 13.5 × 12.5 × 40                       |                      |
|                                                                               | NP-COO <sup>-</sup> & Fn-III <sub>7-10</sub>             | 40 × 12 × 12                           |                      |
|                                                                               | NP-NH <sub>3</sub> <sup>+</sup> & Fn-III <sub>7-10</sub> | 15 × 40 × 13                           |                      |
|                                                                               | NP-CH <sub>3</sub> & Fn-III <sub>7B89</sub>              | 40 × 9.493 × 11.694                    |                      |
|                                                                               | NP-OH & Fn-III <sub>7B89</sub>                           | 8.791 × 40 × 11.225                    |                      |
|                                                                               | NP-COO <sup>-</sup> & Fn-III <sub>7B89</sub>             | 40 × 13.09 × 14.64                     |                      |
|                                                                               | NP-NH <sub>3</sub> <sup>+</sup> & Fn-III <sub>7B89</sub> | 40 × 12.147 × 12.216                   |                      |

**Table S2. Top 20 sites of NP-CH<sub>3</sub> binding to Fn-III<sub>7-10</sub> predicted by molecular docking.**

| <b>No.</b> | <b>Docking score</b> | <b>Residue Number</b>                   |
|------------|----------------------|-----------------------------------------|
| 1 (Site 1) | -3.7945              | 1173 1174 1175 1193 1194 1195 1219      |
| 2 (Site 2) | -3.7302              | 1340 1341 1387 1389 1418 1491 1498      |
| 3          | -3.6961              | 1173 1174 1175 1176 1193 1194 1195 1219 |
| 4          | -3.6690              | 1148 1150 1163 1164 1165 1199 1200      |
| 5          | -3.5286              | 1253 1289 1290 1291                     |
| 6          | -3.4899              | 1258 1259 1260 1261 1262 1264 1287 1288 |
| 7          | -3.4161              | 1398 1405 1406 1407 1408                |
| 8          | -3.3582              | 1151 1152 1153 1232 1233 1235           |
| 9          | -3.3386              | 1151 1152 1153 1232 1233 1235           |
| 10         | -3.2903              | 1245 1246 1253 1255 1290                |
| 11         | -3.2420              | 1422 1423 1503 1504 1505                |
| 12         | -3.2038              | 1176 1217 1224 1225 1226 1227           |
| 13         | -3.2024              | 1258 1262 1263 1264 1287 1288           |
| 14         | -3.1908              | 1404 1405 1406 1407                     |
| 15         | -3.1464              | 1332 1333 1409 1410                     |
| 16         | -3.0900              | 1245 1246 1253 1255                     |
| 17         | -3.0740              | 1217 1224 1225 1227                     |
| 18         | -3.0597              | 1151 1152 1153 1232                     |
| 19         | -3.0247              | 1189 1190 1191                          |
| 20         | -2.9745              | 1190 1191 1193                          |

**Table S3. Top 20 sites of NP-OH binding to Fn-III<sub>7-10</sub> predicted by molecular docking.**

| <b>No.</b> | <b>Docking score</b> | <b>Residue Number</b>                        |
|------------|----------------------|----------------------------------------------|
| 1 (Site 1) | -3.6892              | 1148 1150 1164 1165 1166 1199                |
| 2 (Site 2) | -3.6863              | 1157 1206 1207 1208 1237 1260 1261           |
| 3          | -3.6787              | 1422 1424 1426 1436 1437 1438                |
| 4          | -3.5677              | 1157 1206 1208 1237 1260 1261                |
| 5          | -3.5447              | 1350 1351 1352 1353 1354 1377                |
| 6          | -3.4150              | 1340 1341 1389 1418 1491 1498 1499           |
| 7          | -3.3783              | 1258 1259 1260 1261 1262 1264 1287 1288      |
| 8          | -3.3039              | 1151 1152 1153 1232 1233 1235                |
| 9          | -3.2881              | 1350 1351 1352 1353 1354 1377                |
| 10         | -3.2821              | 1258 1259 1260 1261 1262 1264 1267 1287 1288 |
| 11         | -3.2796              | 1186 1187 1207 1208 1210 1261 1262           |
| 12         | -3.2751              | 1151 1152 1153 1155 1232 1235                |
| 13         | -3.2408              | 1245 1246 1253 1255 1290                     |
| 14         | -3.2372              | 1176 1217 1224 1225                          |
| 15         | -3.1658              | 1176 1217 1224 1225 1226 1227                |
| 16         | -3.1030              | 1422 1424 1436 1437 1438                     |
| 17         | -3.1013              | 1502 1503 1504                               |
| 18         | -3.0345              | 1176 1217 1224 1225                          |
| 19         | -3.0087              | 1176 1217 1224 1225 1226 1227                |
| 20         | -2.9667              | 1152 1161 1163 1200                          |

**Table S4. Top 20 sites of NP-COO<sup>-</sup> binding to Fn-III<sub>7-10</sub> predicted by molecular docking.**

| <b>No.</b> | <b>Docking score</b> | <b>Residue Number</b>              |
|------------|----------------------|------------------------------------|
| 1 (Site 1) | -3.5938              | 1351 1352 1353                     |
| 2 (Site 2) | -3.5181              | 1415 1416 1417 1421                |
| 3          | -3.4884              | 1324 1401 1403                     |
| 4          | -3.4562              | 1301 1351 1353                     |
| 5          | -3.3873              | 1351 1352 1353                     |
| 6          | -3.3241              | 1270 1280 1304 1306 1320           |
| 7          | -3.3127              | 1351 1352 1353                     |
| 8          | -3.3081              | 1431 1476 1477 1478 1479           |
| 9          | -3.3025              | 1142 1143 1144 1145 1224 1225 1226 |
| 10         | -3.2862              | 1351 1353                          |
| 11         | -3.2369              | 1358 1369 1372 1374                |
| 12         | -3.1910              | 1446 1448 1488 1490 1497 1499      |
| 13         | -3.1908              | 1173 1174 1175 1176 1193 1194 1219 |
| 14         | -3.1900              | 1341 1389 1418 1499 1501           |
| 15         | -3.1555              | 1350 1351 1352 1353 1354 1377      |
| 16         | -3.1512              | 1341 1386 1387 1388 1389           |
| 17         | -3.1419              | 1246 1253 1255                     |
| 18         | -3.1379              | 1243 1245 1253 1255 1290 1291      |
| 19         | -3.1334              | 1148 1164 1165 1166 1199           |
| 20         | -3.1304              | 1148 1150 1163 1164 1165 1199 1200 |

**Table S5. Top 20 sites of NP-NH<sub>3</sub><sup>+</sup> binding to Fn-III<sub>7-10</sub> predicted by molecular docking.**

| <b>No.</b> | <b>Docking score</b> | <b>Residue Number</b>                        |
|------------|----------------------|----------------------------------------------|
| 1 (Site 1) | -3.8489              | 1271 1273 1279 1280 1281 1295 1296 1297 1303 |
| 2 (Site 2) | -3.6558              | 1148 1150 1163 1164 1165 1199                |
| 3          | -3.6230              | 1148 1150 1163 1164 1165 1199 1200           |
| 4          | -3.5767              | 1271 1273 1279 1280 1281                     |
| 5          | -3.5708              | 1361 1371 1372 1373 1384 1385                |
| 6          | -3.5462              | 1271 1279 1280 1281 1295 1296 1297           |
| 7          | -3.5227              | 1452 1453 1456 1457 1458 1460                |
| 8          | -3.5067              | 1452 1453 1458 1459 1461 1483                |
| 9          | -3.4608              | 1148 1150 1163 1164 1165 1166 1199           |
| 10         | -3.4477              | 1360 1362 1394 1396 1408 1410                |
| 11         | -3.4306              | 1452 1453 1461 1481 1483                     |
| 12         | -3.4148              | 1178 1179 1180 1189 1190 1191                |
| 13         | -3.4141              | 1217 1224 1225 1226                          |
| 14         | -3.4125              | 1163 1164 1165 1199 1200                     |
| 15         | -3.4047              | 1360 1362 1370 1394 1396 1410                |
| 16         | -3.3830              | 1156 1238 1239 1317 1318 1319                |
| 17         | -3.3333              | 1329 1330 1331 1408 1409 1410                |
| 18         | -3.2993              | 1156 1238 1239 1318 1319 1320                |
| 19         | -3.2934              | 1363 1364 1365 1390 1391                     |
| 20         | -3.2893              | 1275 1300 1301 1302 1351 1353                |

**Table S6. Top 20 sites of NP-CH<sub>3</sub> binding to Fn-III<sub>7B89</sub> predicted by molecular docking.**

| <b>No.</b> | <b>Docking score</b> | <b>Residue Number</b>                        |
|------------|----------------------|----------------------------------------------|
| 1 (Site 1) | -3.9412              | 1186 1187 1266 1268 1269 1271 1290           |
| 2 (Site 2) | -3.8162              | 1280 1281 1327 1328 1329 1330 1359 1381 1382 |
| 3          | -3.7803              | 1197 1198 1200 1201 1203 1206 1227 1228      |
| 4          | -3.7472              | 1186 1187 1266 1268 1269 1271 1290           |
| 5          | -3.7205              | 1197 1198 1199 1200 1201 1203 1206 1227      |
| 6          | -3.6165              | 1304 1307 1308 1311 1329 1332 1334           |
| 7          | -3.5650              | 1485 1488 1491 1493 1508 1510 1515           |
| 8          | -3.5471              | 1304 1307 1308 1311 1327 1328 1329 1332 1334 |
| 9          | -3.5333              | 1187 1188 1290 1291 1292                     |
| 10         | -3.4683              | 1485 1488 1491 1493 1508 1509 1510 1515      |
| 11         | -3.4352              | 1360 1361 1362 1363 1440 1441 1442           |
| 12         | -3.4011              | 1238 1239 1294 1342 1343                     |
| 13         | -3.3945              | 1273 1274 1275 1352 1353 1354                |
| 14         | -3.3744              | 1235 1236 1237 1238 1292 1293 1294           |
| 15         | -3.3601              | 1279 1280 1360 1362 1381 1382                |
| 16         | -3.2792              | 1316 1322 1323 1324                          |
| 17         | -3.1890              | 1289 1291 1319                               |
| 18         | -3.1510              | 1388 1390 1392 1404 1406 1432                |
| 19         | -3.1437              | 1475 1476 1477 1499 1523                     |
| 20         | -3.1345              | 1322 1323 1324                               |

**Table S7. Top 20 sites of NP-OH binding to Fn-III<sub>7B89</sub> predicted by molecular docking.**

| <b>No.</b> | <b>Docking score</b> | <b>Residue Number</b>                        |
|------------|----------------------|----------------------------------------------|
| 1 (Site 1) | -3.6950              | 1280 1281 1359 1360 1361 1362 1380 1381 1382 |
| 2 (Site 2) | -3.6793              | 1186 1187 1268 1290 1291 1292                |
| 3          | -3.6307              | 1197 1198 1200 1201 1203 1206 1227           |
| 4          | -3.6104              | 1276 1277 1284 1285 1286 1322 1323 1324      |
| 5          | -3.5619              | 1236 1237 1238 1239 1294 1342 1343           |
| 6          | -3.5225              | 1238 1239 1293 1294 1342 1343                |
| 7          | -3.5134              | 1186 1187 1268 1289 1290 1291 1292           |
| 8          | -3.4675              | 1188 1189 1235 1236 1237 1292 1293 1294      |
| 9          | -3.4617              | 1304 1308 1311 1329 1332 1334                |
| 10         | -3.4390              | 1197 1198 1200 1201 1203 1206 1227           |
| 11         | -3.4287              | 1280 1360 1362 1380 1381 1382                |
| 12         | -3.2795              | 1187 1290 1291 1292                          |
| 13         | -3.2493              | 1273 1274 1275 1352 1353                     |
| 14         | -3.2005              | 1289 1291 1318 1319 1320 1321 1322           |
| 15         | -3.1514              | 1316 1320 1322 1323 1324                     |
| 16         | -3.1199              | 1475 1476 1477 1499 1523                     |
| 17         | -3.0907              | 1475 1476 1477 1499 1523                     |
| 18         | -3.0476              | 1288 1289 1291 1322                          |
| 19         | -3.0449              | 1280 1281 1362 1380 1381 1382                |
| 20         | -3.0132              | 1299 1339 1346 1349                          |



**Table S8. Top 20 sites of NP-COO<sup>-</sup> binding to Fn-III<sub>7B89</sub> predicted by molecular docking.**

| <b>No.</b> | <b>Docking score</b> | <b>Residue Number</b>                        |
|------------|----------------------|----------------------------------------------|
| 1 (Site 1) | -3.8907              | 1396 1397 1422 1423 1424 1446                |
| 2 (Site 2) | -3.2142              | 1393 1395 1401 1403 1417 1418 1419 1420 1425 |
| 3          | -3.2033              | 1289 1290 1291 1318 1319 1320                |
| 4          | -3.1848              | 1188 1291 1292 1293                          |
| 5          | -3.1291              | 1393 1395 1401 1403 1417 1418 1425           |
| 6          | -3.1531              | 1189 1235 1292 1293 1294                     |
| 7          | -3.1507              | 1483 1485 1491 1493 1508 1510 1515           |
| 8          | -3.1071              | 1393 1395 1403 1417 1418 1419 1420 1425      |
| 9          | -3.1066              | 1173 1174 1255 1256 1257                     |
| 10         | -3.0536              | 1236 1237 1238 1293 1294                     |
| 11         | -3.0389              | 1371 1419 1421 1450 1473                     |
| 12         | -3.0316              | 1484 1485 1488 1491 1492 1493 1508 1510 1515 |
| 13         | -3.0108              | 1371 1421 1450 1451 1473                     |
| 14         | -2.9838              | 1475 1476 1477 1499 1523                     |
| 15         | -2.9705              | 1276 1277 1284 1285 1286 1322 1323 1324      |
| 16         | -2.9649              | 1276 1277 1284 1285 1286 1322 1323 1324      |
| 17         | -2.9605              | 1304 1306 1307 1308 1311 1329 1332 1334      |
| 18         | -2.9538              | 1274 1275 1352                               |
| 19         | -2.9146              | 1304 1306 1307 1308 1311 1327 1329 1332 1334 |
| 20         | -2.9132              | 1280 1281 1327 1328 1330 1359 1381 1382 1384 |

**Table S9. Top 20 sites of NP-NH<sub>3</sub><sup>+</sup> binding to Fn-III<sub>7B89</sub> predicted by molecular docking.**

| <b>No.</b> | <b>Docking score</b> | <b>Residue Number</b>                        |
|------------|----------------------|----------------------------------------------|
| 1 (Site 1) | -3.8522              | 1187 1269 1270 1271 1272 1288 1290           |
| 2 (Site 2) | -3.8092              | 1280 1281 1328 1329 1330 1359 1382 1384      |
| 3          | -3.6760              | 1304 1305 1306 1307 1308 1309                |
| 4          | -3.6644              | 1360 1361 1362 1439 1440 1441                |
| 5          | -3.6577              | 1280 1281 1328 1329 1330 1382                |
| 6          | -3.6533              | 1280 1281 1359 1360 1362 1381 1382           |
| 7          | -3.6329              | 1186 1187 1266 1269 1271 1290                |
| 8          | -3.6013              | 1483 1484 1485 1491 1493 1508 1509 1510 1515 |
| 9          | -3.5947              | 1483 1484 1485 1488 1491 1492 1493           |
| 10         | -3.5207              | 1274 1275 1352 1353 1354                     |
| 11         | -3.4994              | 1280 1359 1360 1362 1380 1381 1382           |
| 12         | -3.4559              | 1186 1187 1268 1289 1290 1291                |
| 13         | -3.4526              | 1280 1359 1360 1362 1381 1382                |
| 14         | -3.4449              | 1273 1274 1275 1352 1353 1354                |
| 15         | -3.4408              | 1372 1419 1421 1450 1451 1453 1473           |
| 16         | -3.4301              | 1276 1277 1284 1285 1286 1322 1323 1324      |
| 17         | -3.4224              | 1276 1277 1284 1285 1322 1323 1324           |
| 18         | -3.3959              | 1280 1359 1360 1362 1381 1382                |
| 19         | -3.3939              | 1312 1314 1323 1324                          |
| 20         | -3.3800              | 1372 1419 1421 1450 1451 1453 1473           |

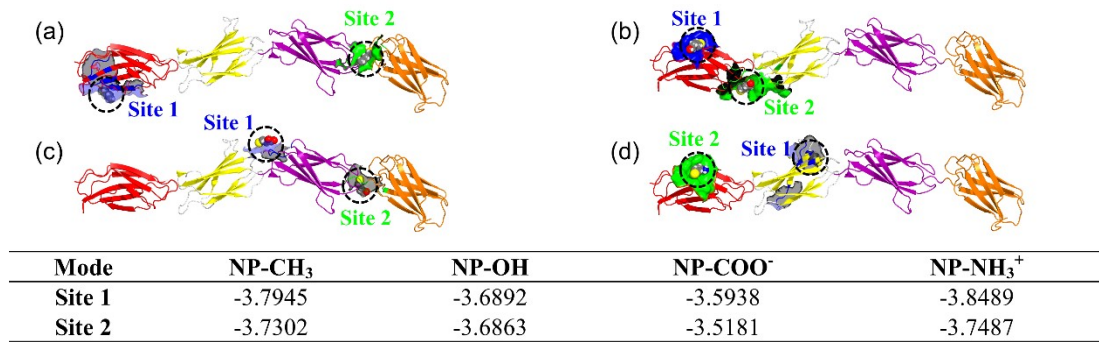

**Fig. S1** Two preferred binding sites of NP-CH<sub>3</sub> (a), NP-OH (b), NP-COO<sup>-</sup> (c), and NP-NH<sub>3</sub><sup>+</sup> (d) on the Fn-III<sub>7-10</sub> segments. The bottom shows the docking score reflecting the binding affinity of different NPs to Fn-III<sub>7-10</sub>.

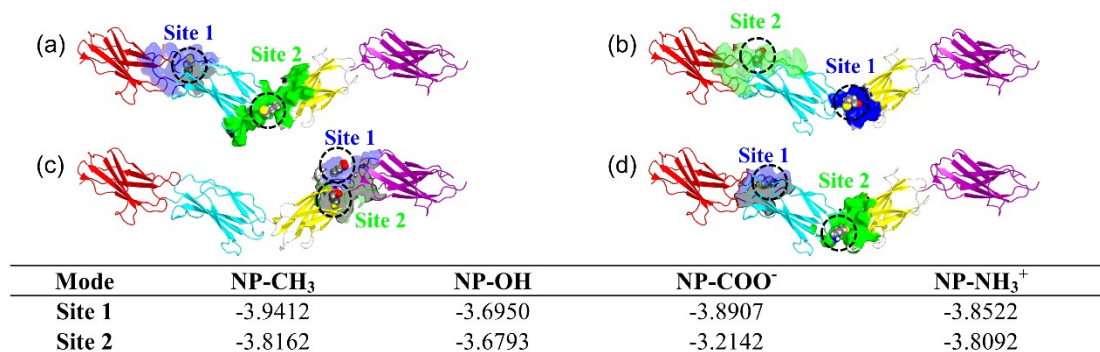

**Fig. S2** Two preferred binding sites of NP-CH<sub>3</sub> (a), NP-OH (b), NP-COO<sup>-</sup> (c), and NP-NH<sub>3</sub><sup>+</sup> (d) on the Fn-III<sub>7B89</sub> segments. The bottom shows the docking score reflecting the binding affinity of different NPs to Fn-III<sub>7B89</sub>.

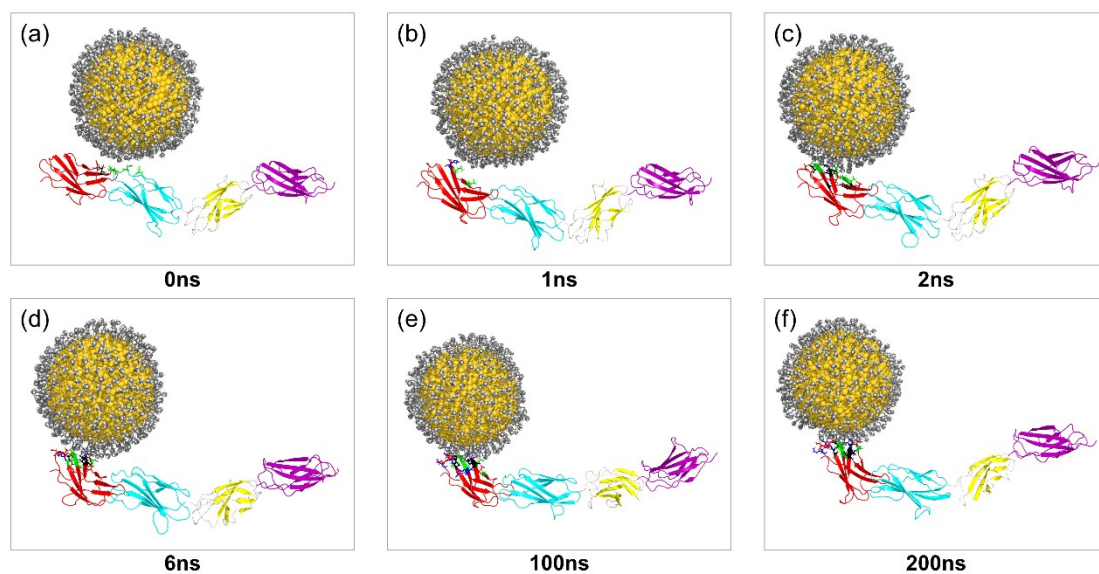

**Fig. S3** Time sequence of typical snapshots depicting transfer of NP-CH<sub>3</sub> toward terminal of the Fn-III<sub>7B89</sub> segment, which is regarded as invalid because Fn-III<sub>7B89</sub> is an intermediate segment with both terminals connected with other domains.

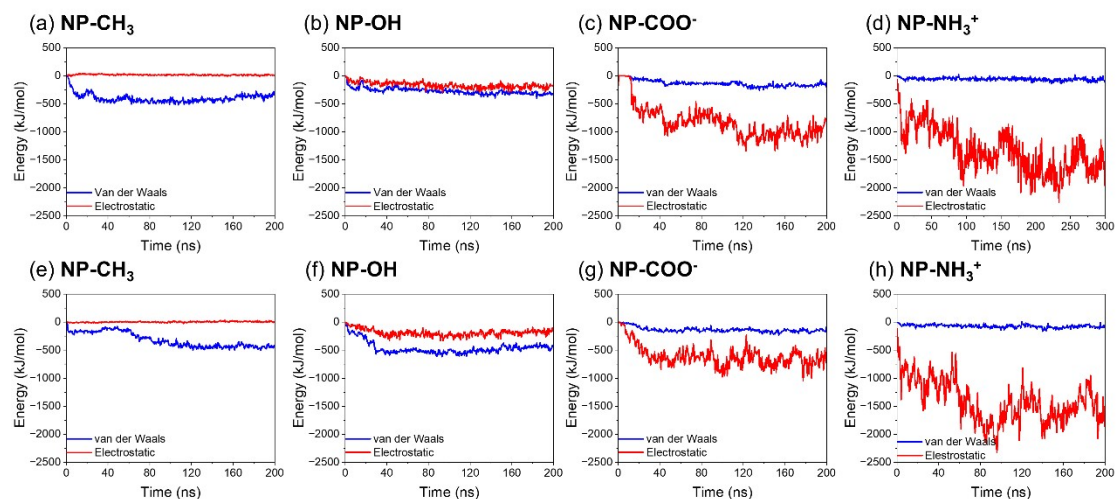

**Fig. S4** Time evolutions of the interaction energies between different NPs and two protein segments. (a) NP-CH<sub>3</sub> on Fn-III<sub>7-10</sub>; (b) NP-OH on Fn-III<sub>7-10</sub>; (c) NP-COO<sup>-</sup> on Fn-III<sub>7-10</sub>; (d) NP-NH<sub>3</sub><sup>+</sup> on Fn-III<sub>7-10</sub>; (e) NP-CH<sub>3</sub> on Fn-III<sub>7B89</sub>; (f) NP-OH on Fn-III<sub>7B89</sub>; (g) NP-COO<sup>-</sup> on Fn-III<sub>7B89</sub>; (h) NP-NH<sub>3</sub><sup>+</sup> on Fn-III<sub>7B89</sub>.

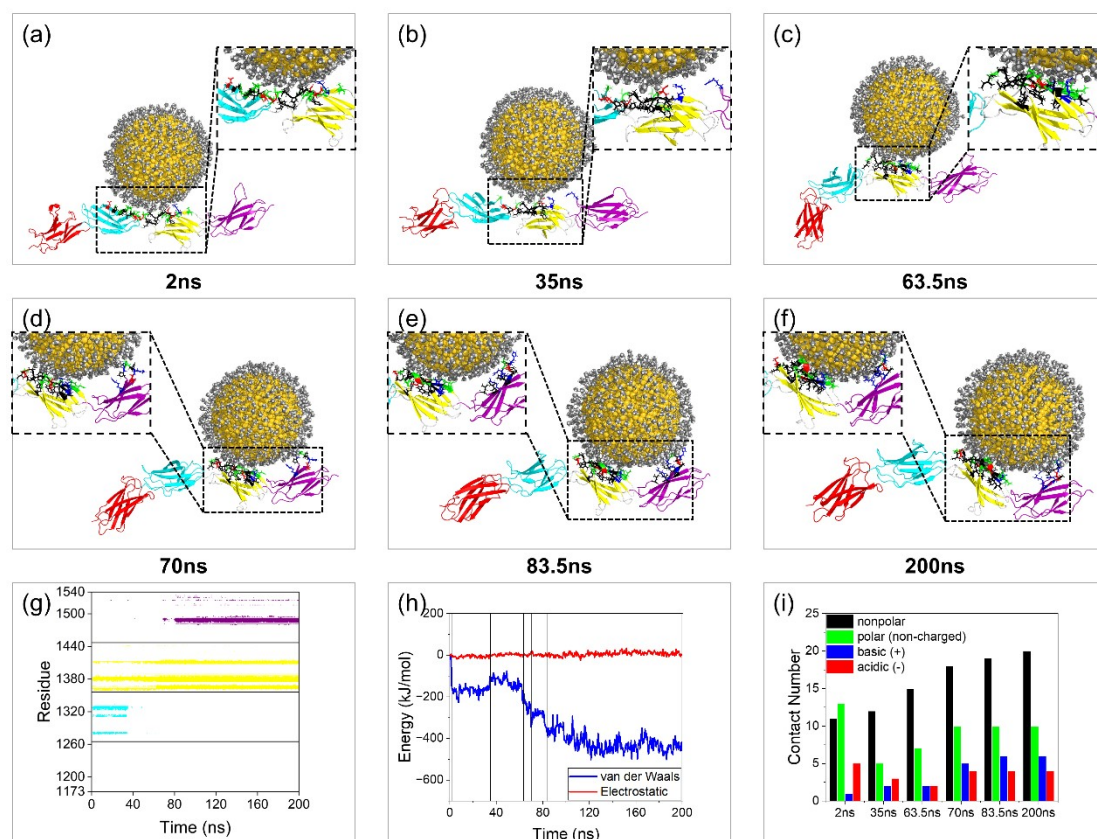

**Fig. S5** Migration of NP-CH<sub>3</sub> on the Fn-III<sub>7B89</sub> segment. (a-f) Time sequence of typical snapshots. (g) Time evolutions of residues in contact with the NP-CH<sub>3</sub>. As is seen, NP-CH<sub>3</sub> firstly acquired contacts with residues in domains Fn-III<sub>B</sub> and Fn-III<sub>8</sub>. At  $t = 38$  ns, it lost contacts with Fn-III<sub>B</sub> and acquire more favorable contacts with residues in the domain Fn-III<sub>9</sub>. (h) Time evolutions of the van der Waals and electrostatic interaction energies between NP-CH<sub>3</sub> and Fn-III<sub>7B89</sub>. (i) The numbers of residues of different types in contact with NP-CH<sub>3</sub> at different time points.

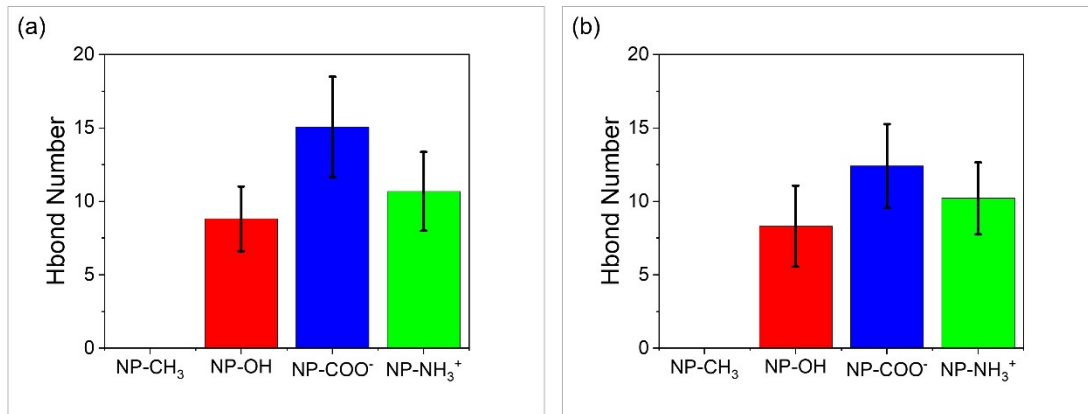

**Fig. S6** The numbers of hydrogen bonds formed between different NPs and two protein segments. (a) Fn-III<sub>7-10</sub>, (b) Fn-III<sub>7B89</sub>.



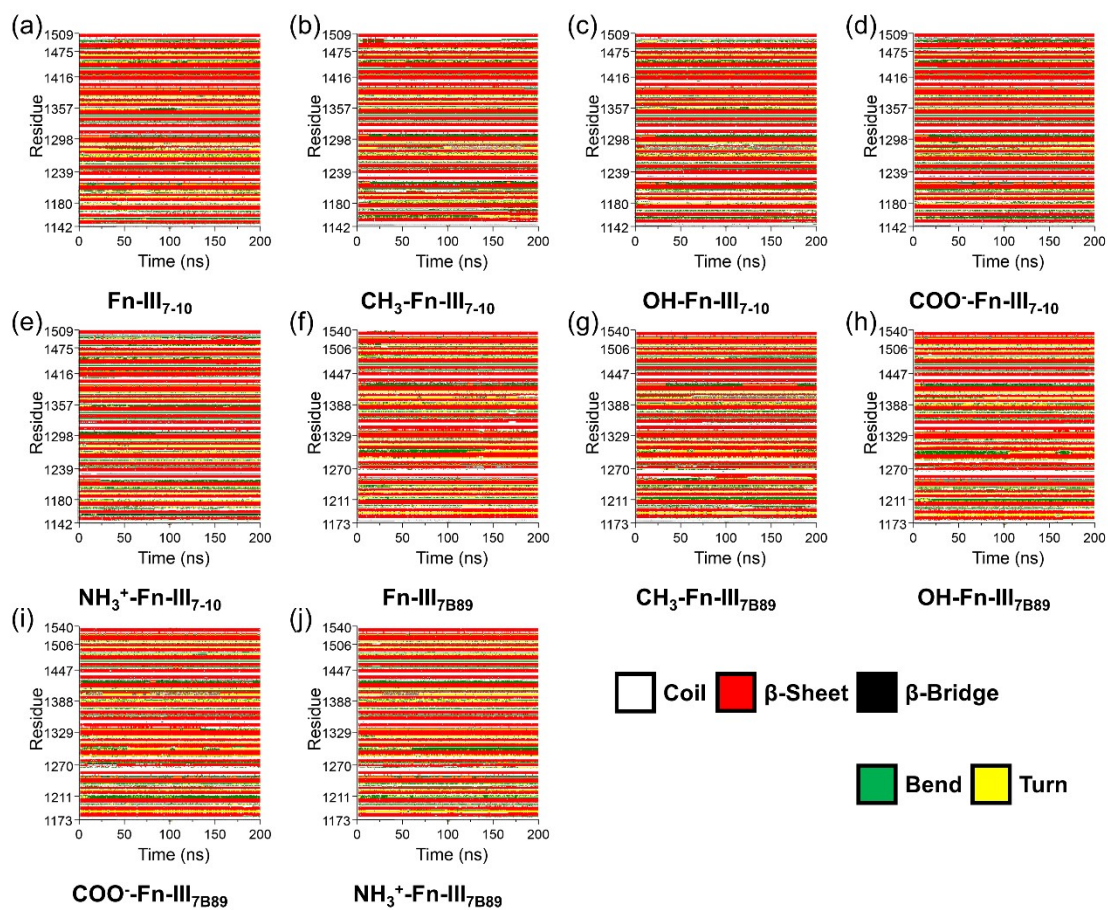

**Fig. S7** Time evolutions of the secondary structures of Fn-III<sub>7-10</sub> (a-e) and Fn-III<sub>7B89</sub> (f-j) before (a, f) and after interactions with NP-CH<sub>3</sub> (b, g), NP-OH (c, h), NP-COO<sup>-</sup> (d, i), and NP-NH<sub>3</sub><sup>+</sup> (e, j)

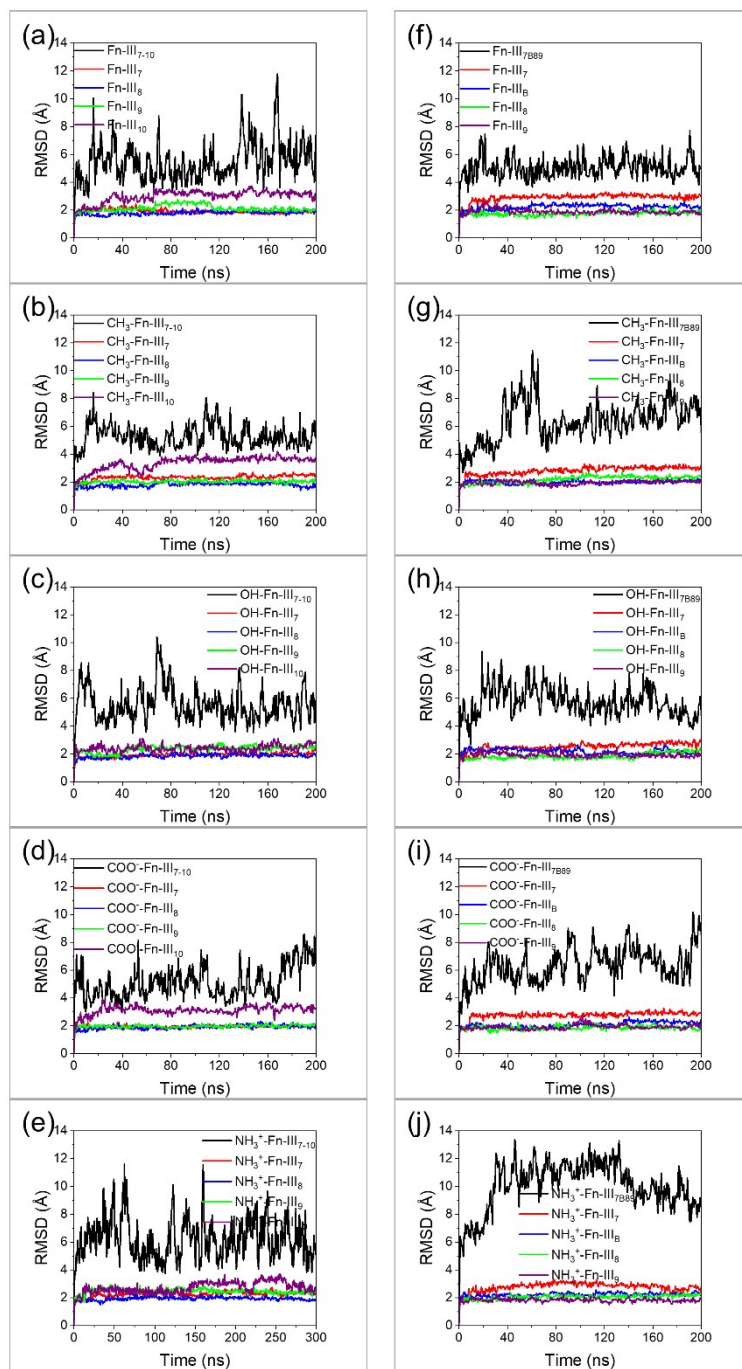

**Fig. S8** Time evolutions of the root-mean-square displacement (RMSD) for the entire Fn-III<sub>7-10</sub> (a-e) and Fn-III<sub>7B89</sub> (f-j) segments and different domains before (a, f) and after interactions with NP-CH<sub>3</sub> (b, g), NP-OH (c, h), NP-COO<sup>-</sup> (d, i), and NP-NH<sub>3</sub><sup>+</sup> (e, j).

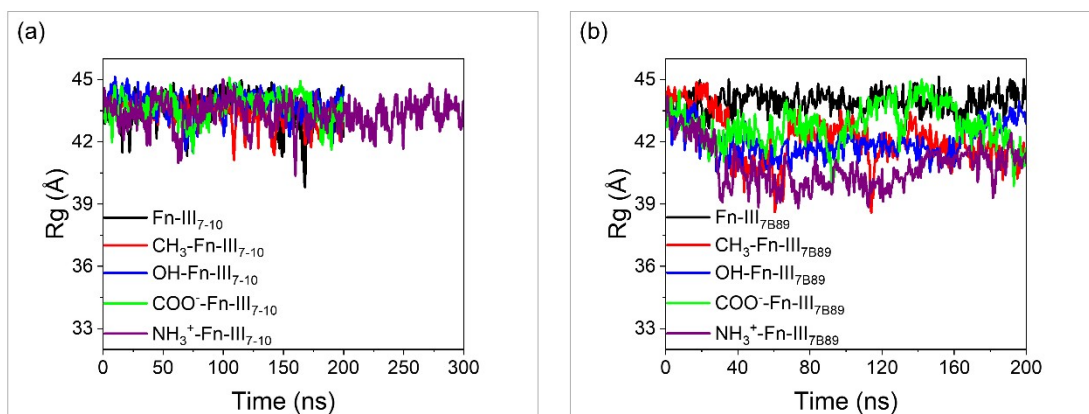

**Fig. S9** Time evolutions of the gyration radius ( $R_g$ ) of Fn-III<sub>7-10</sub> (a) and Fn-III<sub>7B89</sub> (b) segments before and after interactions with different NPs.

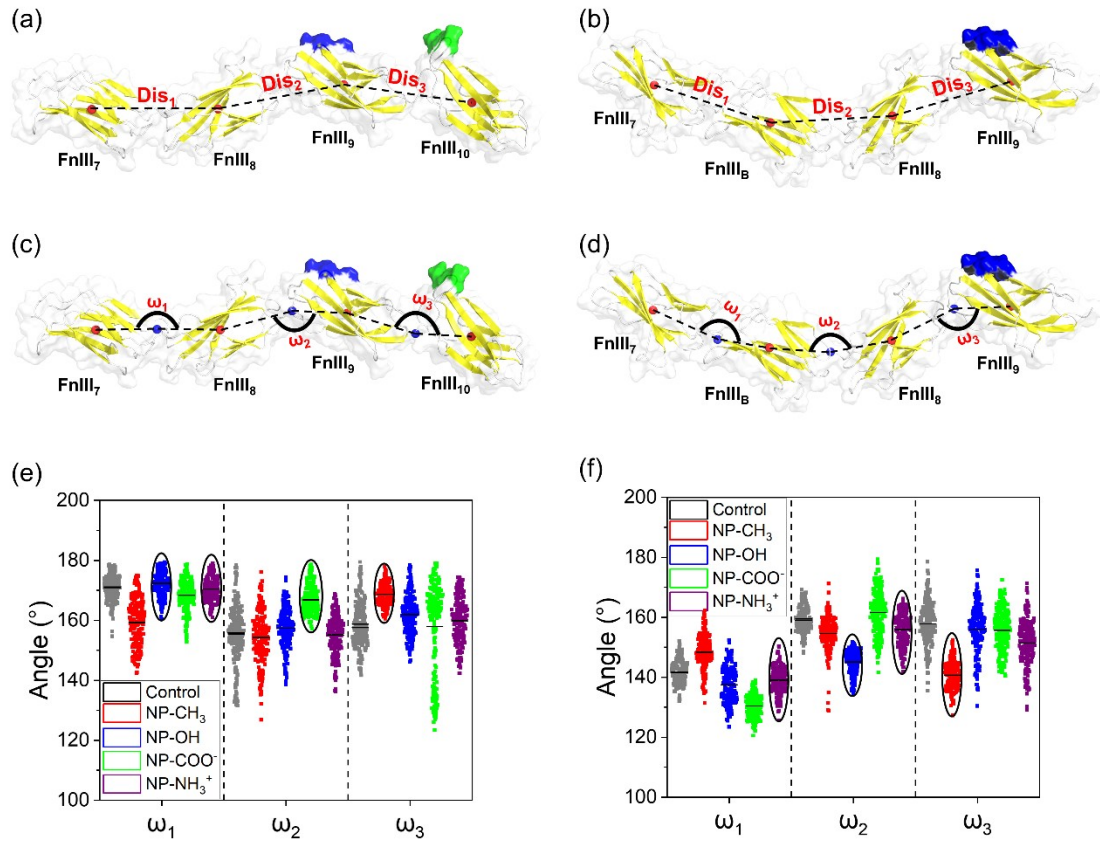

**Fig. S10** Protein deformation induced by different NPs. (a-d) Illustration of the calculation of the inter-domain distance (a, b) and angle (c, d). (e, f) The distributions of angles between adjacent domains in Fn-III<sub>7-10</sub> (e) and Fn-III<sub>7B89</sub> (f) segments before and after interactions with different NPs.

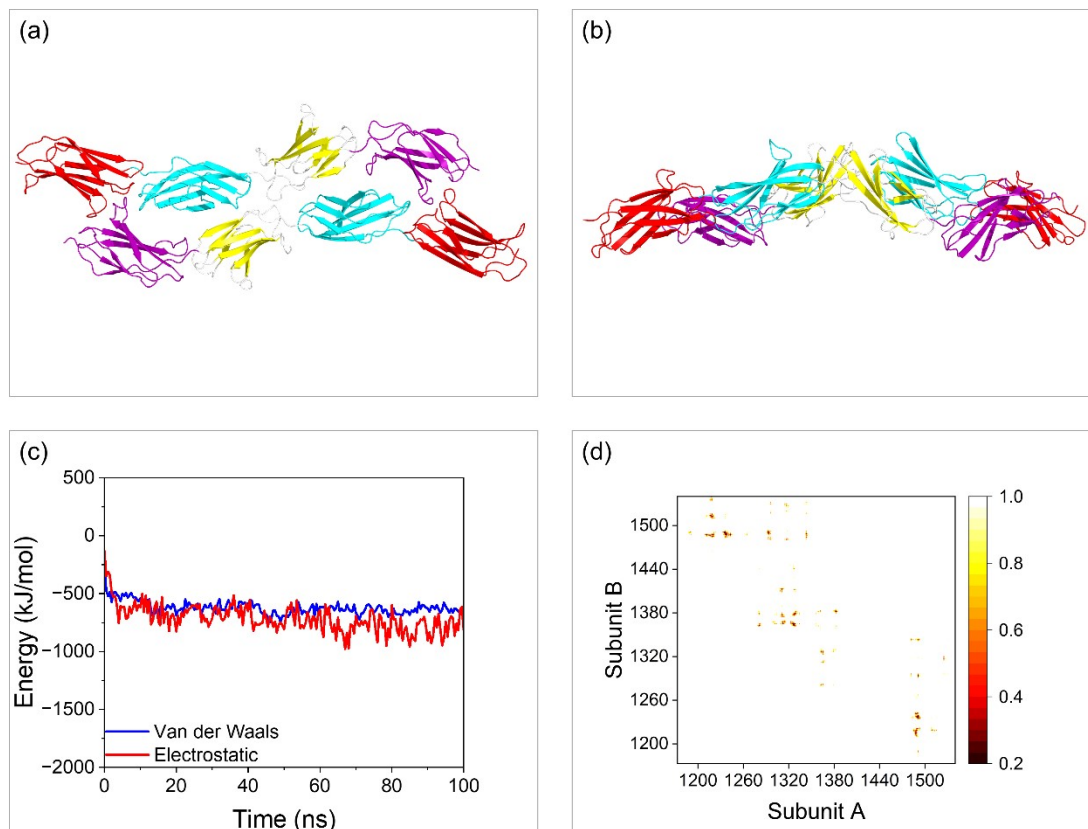

**Fig. S11** Dimerization of Fn-III<sub>7B89</sub>. (a, b) Equilibrium structure of the dimerized Fn-III<sub>7B89</sub> from top (a) and side (b) views. (c) Time evolutions of the interaction energy between two dimerized proteins. (d) The map of probability of inter-subunit residue contacts at the dimer interface of Fn-III<sub>7B89</sub>.

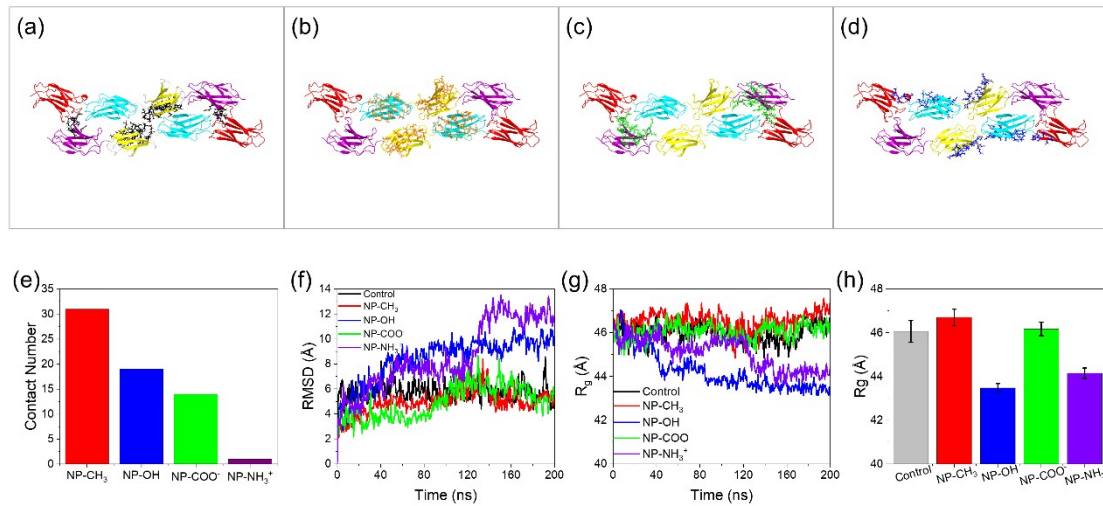

**Fig. S12** Perturbation of the Fn-III<sub>7B89</sub> dimerization by different NPs. (a-d) The equilibrium structures of the Fn-III<sub>7B89</sub> dimer. Resides in contact with NP-CH<sub>3</sub> (a), NP-OH (b), NP-COO<sup>-</sup> (c), and NP-NH<sub>3</sub><sup>+</sup> (d) identified from monomer simulations are displayed with stick models. (e) The number of residues at the dimer interface of Fn-III<sub>7B89</sub> in contact with different NPs in monomer simulations. (f) Time evolutions of the RMSD of the Fn-III<sub>7B89</sub> dimer before and after interactions with different NPs. (g) Time evolutions of the Rg of the Fn-III<sub>7B89</sub> dimer before and after interactions with different NPs. (h) The average Rg of the dimerized Fn-III<sub>7B89</sub> before and after interactions with different NPs.

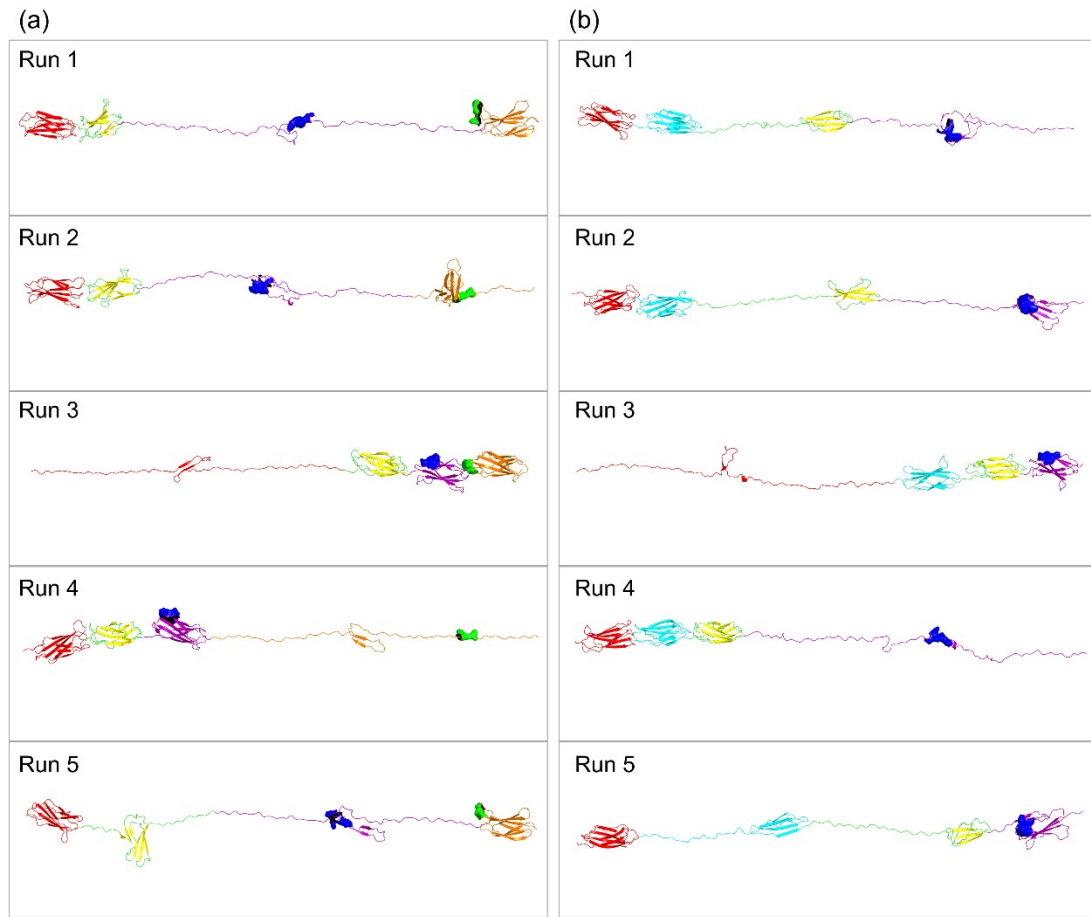

**Fig. S13** Final snapshots of five independent simulations of the mechanical stretching on Fn-III<sub>7-10</sub> (a) and Fn-III<sub>7B89</sub> (b).



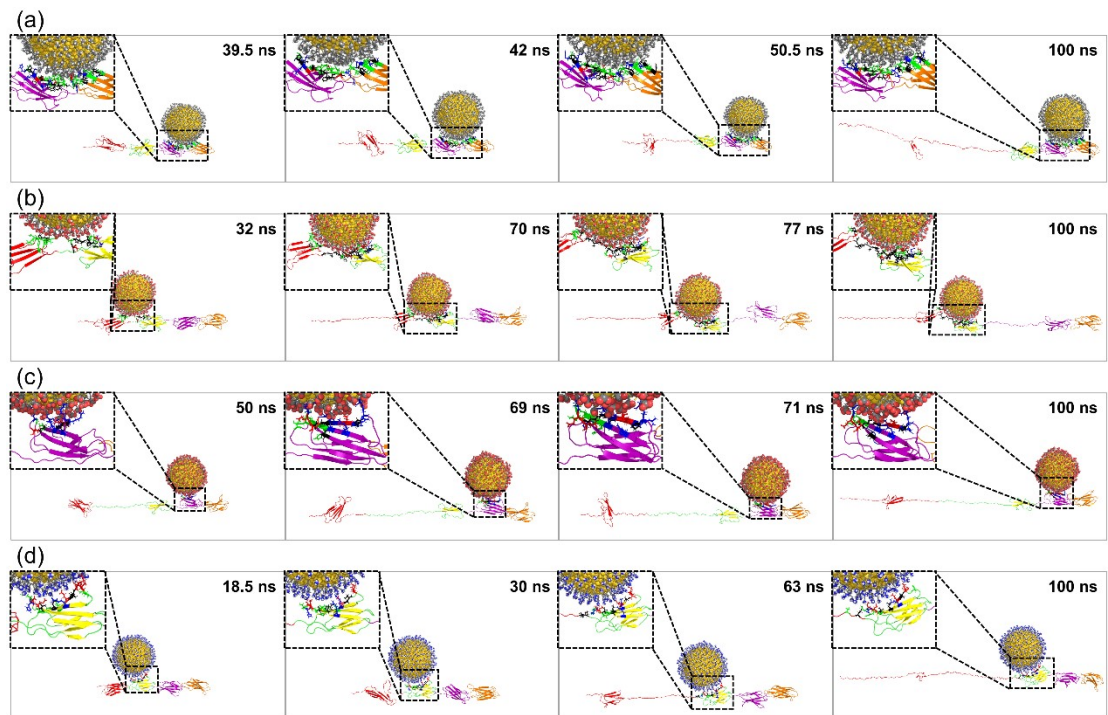

**Fig. S14** Time sequences of typical snapshots depicting the mechanical stretching of Fn-III<sub>7-10</sub> bound with NP-CH<sub>3</sub> (a), NP-OH (b), NP-COO<sup>-</sup> (c), and NP-NH<sub>3</sub><sup>+</sup> (d).



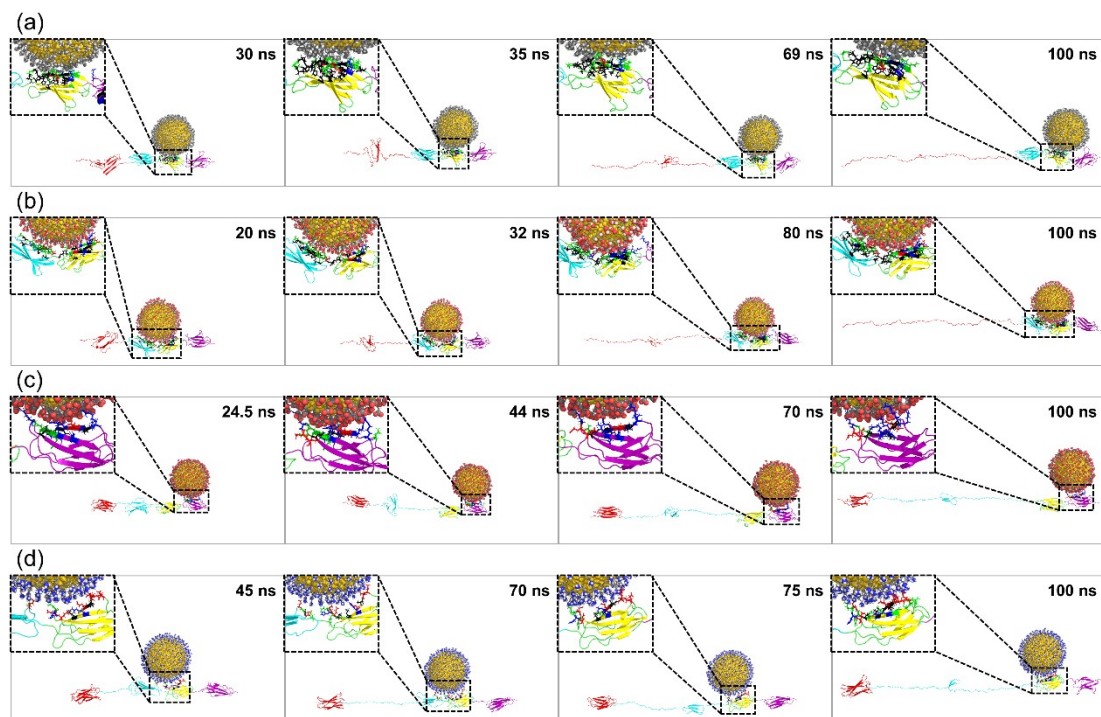

**Fig. S15** Time sequences of typical snapshots depicting the mechanical stretching of Fn-III<sub>7B89</sub> bound with NP-CH<sub>3</sub> (a), NP-OH (b), NP-COO<sup>-</sup> (c), and NP-NH<sub>3</sub><sup>+</sup> (d).

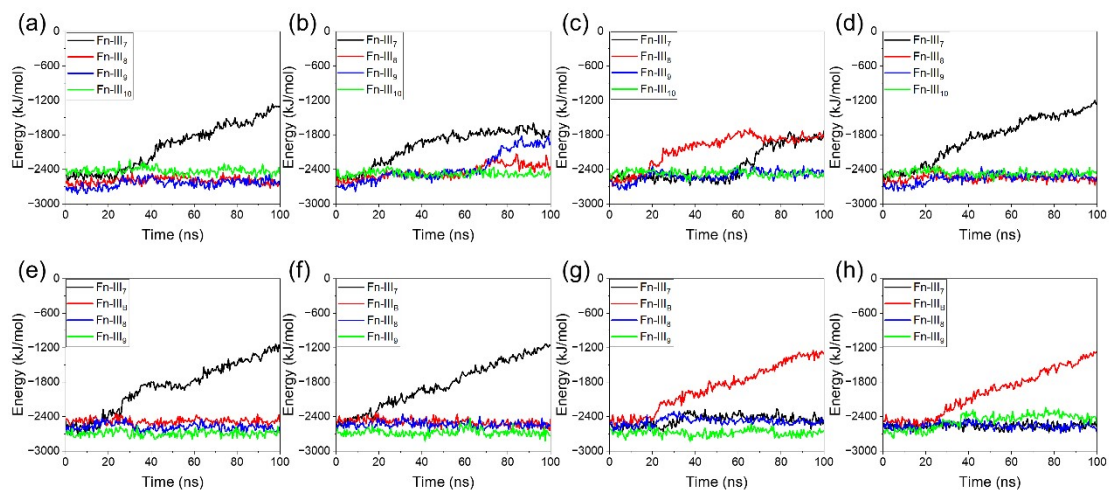

**Fig. S16** Time evolutions of the intra-domain interactions in stretched Fn-III<sub>7-10</sub> (a-d) and Fn-III<sub>7B89</sub> (e-h) bound with NP-CH<sub>3</sub> (a, e), NP-OH (b, f), NP-COO<sup>-</sup> (c, g), and NP-NH<sub>3</sub><sup>+</sup> (d, h).
